# Supplementary material for: Facile preparation of N-doped graphitic carbon encapsulated nickel catalysts for transfer hydrogenolysis of lignin β-O-4 model compounds to aromatics
Source: Royal Society of Chemistry journal article supplement (doi:10.1039/d2se00080f), 2022-01-01

## Supporting Information

# Facile Preparation of N-Doped Graphitic Carbon Encapsulated Nickel Catalysts for Transfer hydrogenolysis of Lignin $\beta$ -O-4 Model Compounds to Aromatics

Hua Tan,<sup>\*,a,d</sup> Xuecheng Li,<sup>a</sup> Hao Ma,<sup>a</sup> Xiaolin Yang,<sup>a</sup> Tong Zhan,<sup>b,c</sup> Wenyu Xie,<sup>b,c</sup>

Suhua Wang,<sup>c,d</sup> Jiaping Zhu<sup>\*,a</sup>

<sup>a</sup> College of Chemistry, Guangdong University of Petrochemical Technology, Maoming 525000, P. R. China

<sup>b</sup> Guangdong Provincial Key Laboratory of Petrochemical Pollution Process and Control, Guangdong University of Petrochemical Technology, Maoming 525000, P. R. China

<sup>c</sup> College of Environmental Science and engineering, Guangdong University of Petrochemical Technology, Maoming 525000, P. R. China

<sup>d</sup> Research Institute of Environmental and Safety Technology, Guangdong University of Petrochemical Technology, Maoming 525000, P. R. China

\*Corresponding Author: [huatan@gdupt.edu.cn](mailto:huatan@gdupt.edu.cn); [zhu04401539@163.com](mailto:zhu04401539@163.com)

**KEYWORDS:** lignin  $\beta$ -O-4 model compounds; transfer hydrogenolysis; the encapsulated Ni; N-doped graphitic carbon shell; isopropanol

**Table S1** The Ni content in various catalysts measured by ICP-OES

| Catalysts   | Ni content (wt%) by ICP-OES |
|-------------|-----------------------------|
| Ni/NC-800   | 12.16                       |
| Ni@NC-600-H | 2.67                        |
| Ni@NC-800-S | 7.83                        |
| Ni/NC-800-S | 10.33                       |

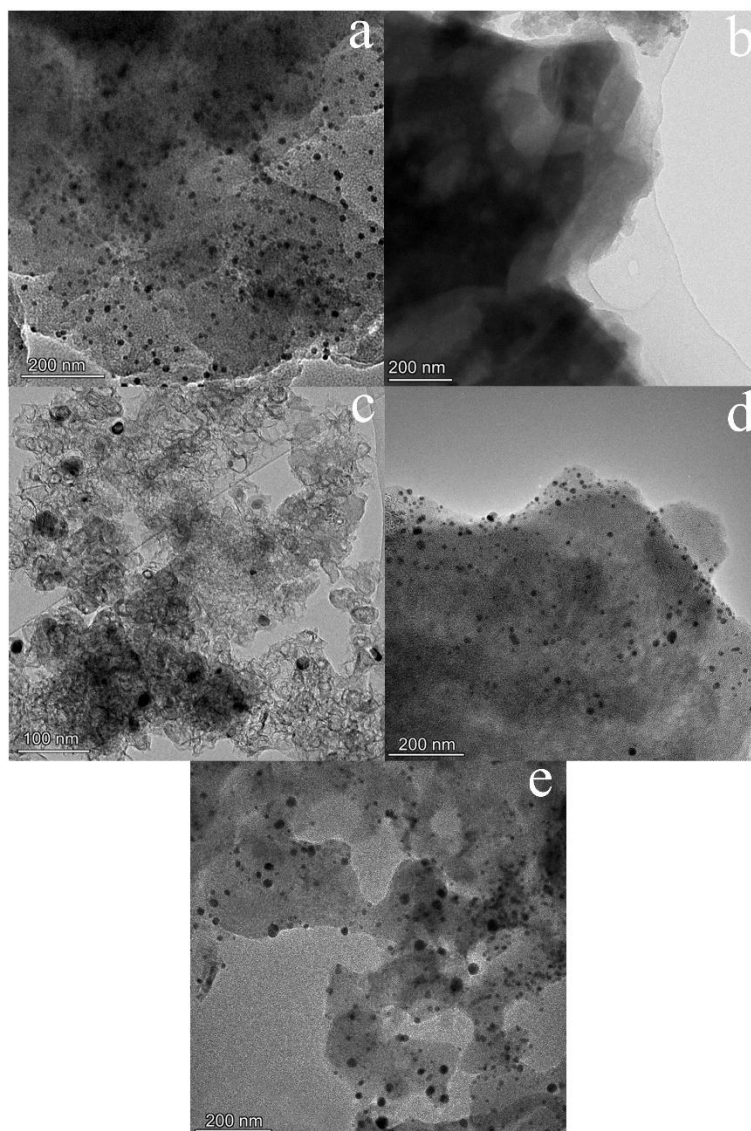

**Figure S1** TEM images of Ni/NC-600 (a), Ni@NC-600-H (b), Ni@NC-800-S (c), Ni/NC-800 (d), and Ni/NC-800-S (e).

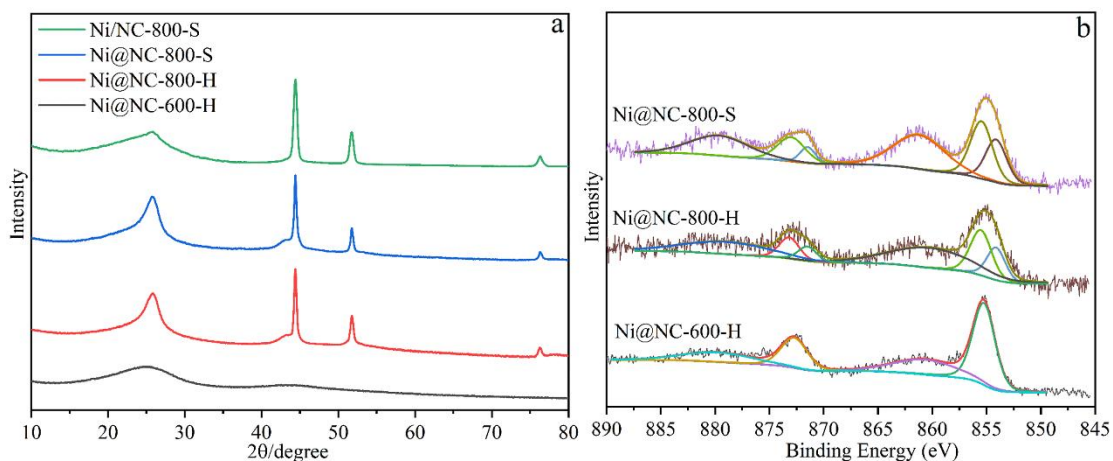

**Figure S2** (a) XRD patterns of Ni@NC-600-H, Ni@NC-800-H, Ni@NC-800-S, and Ni/NC-800-S. (b) XPS Ni 2p spectra of Ni@NC-600-H, Ni@NC-800-H, and Ni@NC-800-S.

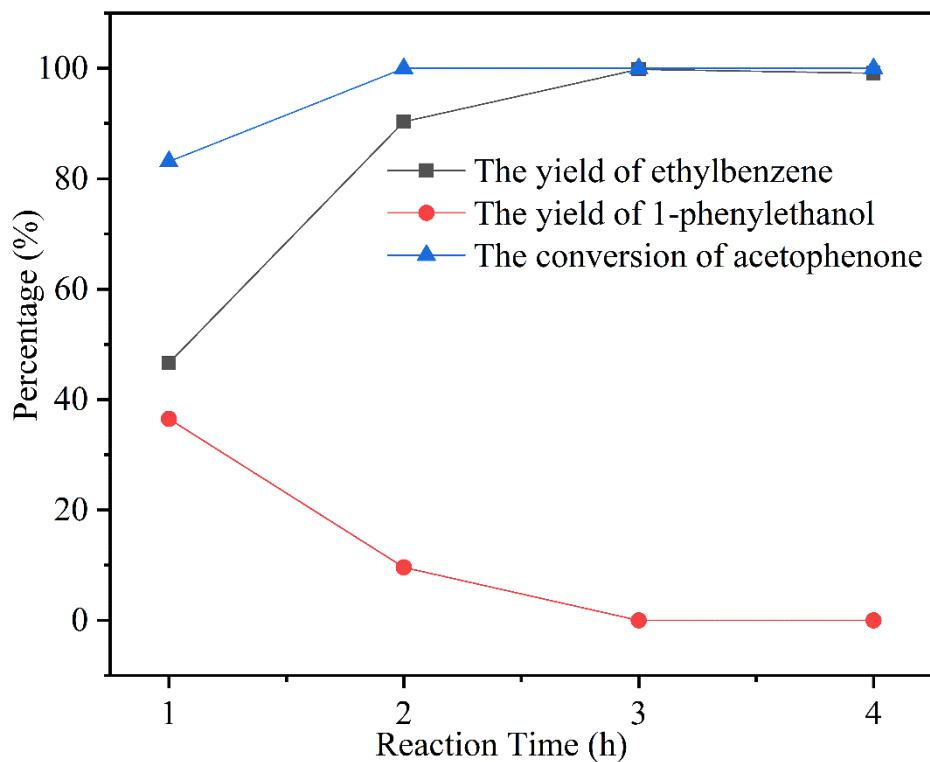

**Figure S3** The effect of reaction time for the conversion of acetophenone over Ni@NC-800-H at 180 °C.

## **Synthesis of the $\beta$ -O-4 lignin alcohol and ketone model compounds and detailed NMR characterizations**

For the synthesis of 2-phenoxy-1-phenylethanone, a 150 mL round bottom flask equipped with a reflux condenser and a dropping funnel was charged with phenol (0.591 g, 6.28 mmol), 2-bromoacetophenone (1.000 g, 5.02 mmol) and  $K_2CO_3$  (1.040 g, 7.54 mmol) in acetone (50 mL). The resulting suspension was stirred under reflux for 5 h, after the suspension was filtered and concentrated in vacuum. The crude product was purified by recrystallization from hexane/ethyl acetate solvent (100 mL, 3:1 Volume ratio) to give 2-phenoxy-1-phenylethanone as a white solid. For the synthesis of 2-phenoxy-1-phenethanol, A round bottom flask was charged with 2-phenoxy-1-phenylethanone (1.00 g, 4.71 mmol) in THF/ $H_2O$  solvent (25 mL, 4:1 Volume ratio). Sodium borohydride (0.39 g, 10.41 mmol) was added to the solution in small portions at room temperature. After stirring for 6 h, the suspension was quenched with saturated aqueous  $NH_4Cl$ , followed by the addition of ethyl acetate. After separation, the organic phase was washed with  $H_2O$ , dried over Anhydrous  $MgSO_4$ , filtered and the solvent was evaporated under vacuum. The crude product was purified by recrystallization from hexane to give a white crystalline. For the other methoxyl substituted 2-phenoxy-1-phenylethanone and 2-phenoxy-1-phenethanol, the preparation procedure is the same as described above, except that using different starting materials. In addition, for the synthesis of 1-(3,4-dimethoxyphenyl)-3-hydroxy-2-(2-methoxyphenoxy)propan-1-one,  $K_2CO_3$  (1.2 g, 8.6 mmol) and 1-(3,4-dimethoxyphenyl)-2-(2-methoxyphenoxy)ethanone (2.4 g, 8 mmol) were added in

ethanol: acetone (v/v=1:1, 40 mL) mixed solvent in a 100 mL round bottom flask under stirring at room temperature, then formaldehyde (36.5-38%) (1.2 mL, 14.6 mmol) was added and stirred for 4 h. subsequently, the reaction mixture was concentrated under vacuum to get a solid product. The solid was purified by column chromatography (pentane/ethyl acetate, 1:1) to yield 1-(3,4-dimethoxyphenyl)-3-hydroxy-2-(2-methoxyphenoxy)propan-1-one as yellow solid (2.40 g, 7.2 mmol) with 90% yield. For 1-(3,4-dimethoxyphenyl)-2-(2-methoxyphenoxy)propane-1,3-diol and guaiacylglycerol- $\beta$ -guaiacyl ether, they are purchased from Aladdin reagent company (Shanghai, China). The NMR spectra of all above compounds, which were in accordance with theoretically predicted, were shown in below.

## 2-phenoxyacetophenone

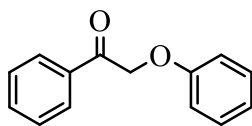

### <sup>1</sup>H NMR (400 MHz, D6-DMSO)

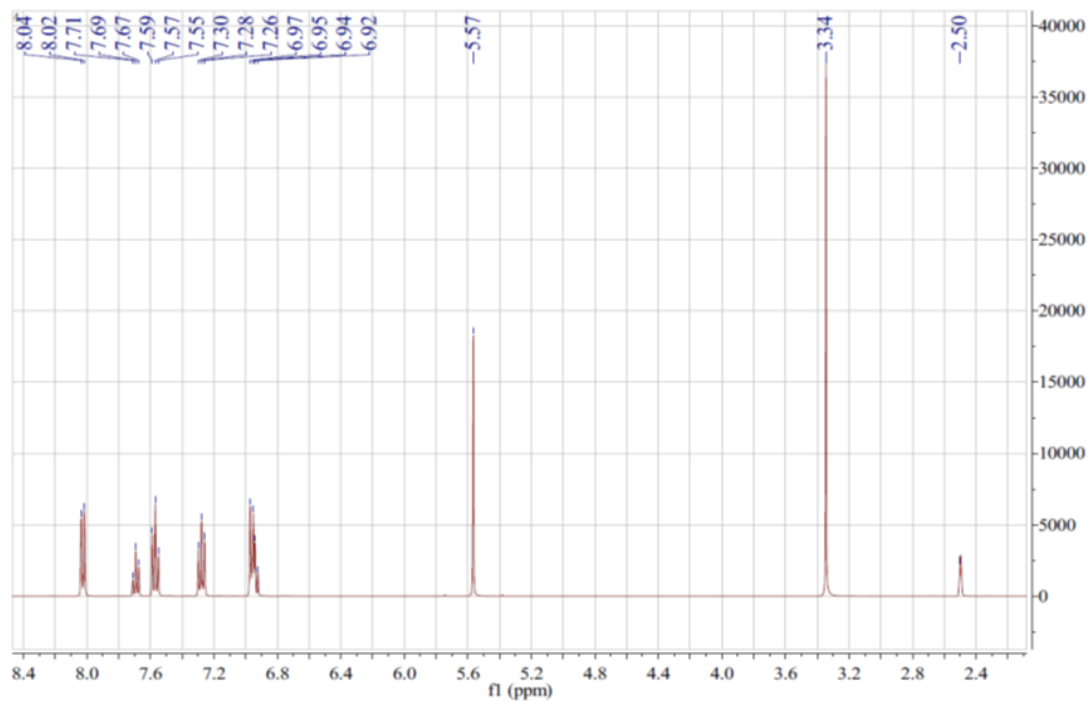

### <sup>13</sup>C NMR (400 MHz, D6-DMSO)

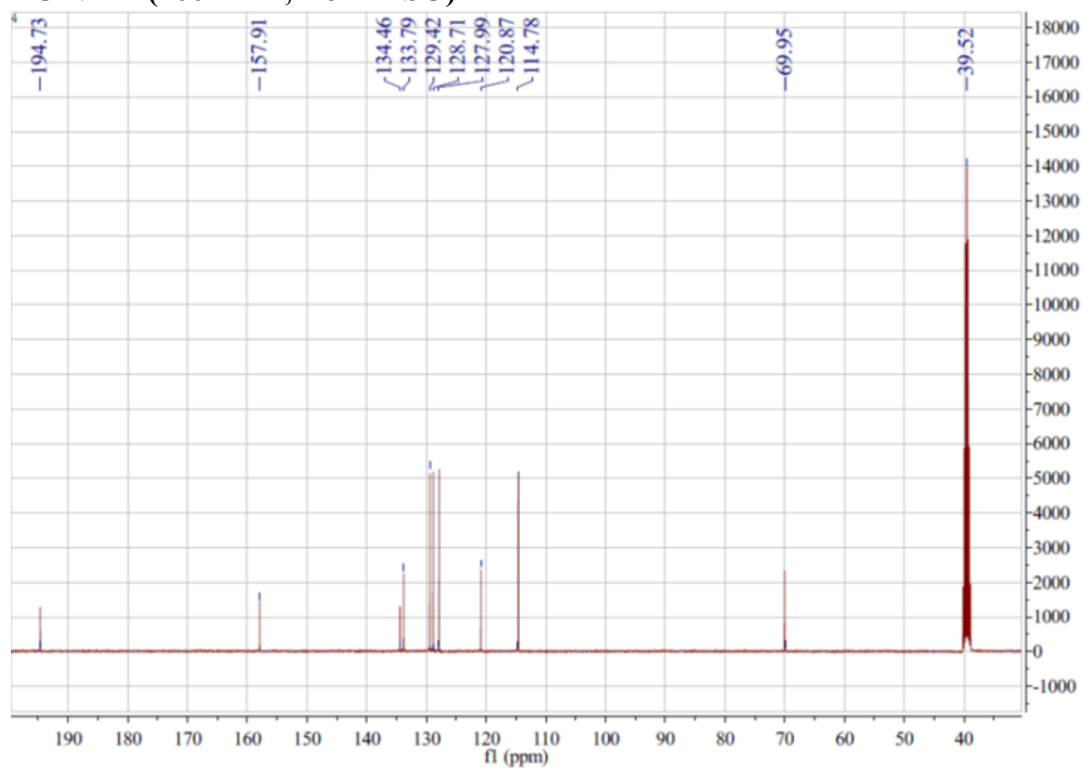

## 2-(2-methoxyphenoxy)-1-phenylethan-1-one

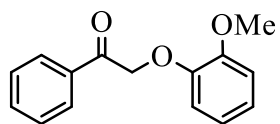

### <sup>1</sup>H NMR (400 MHz, D6-DMSO)

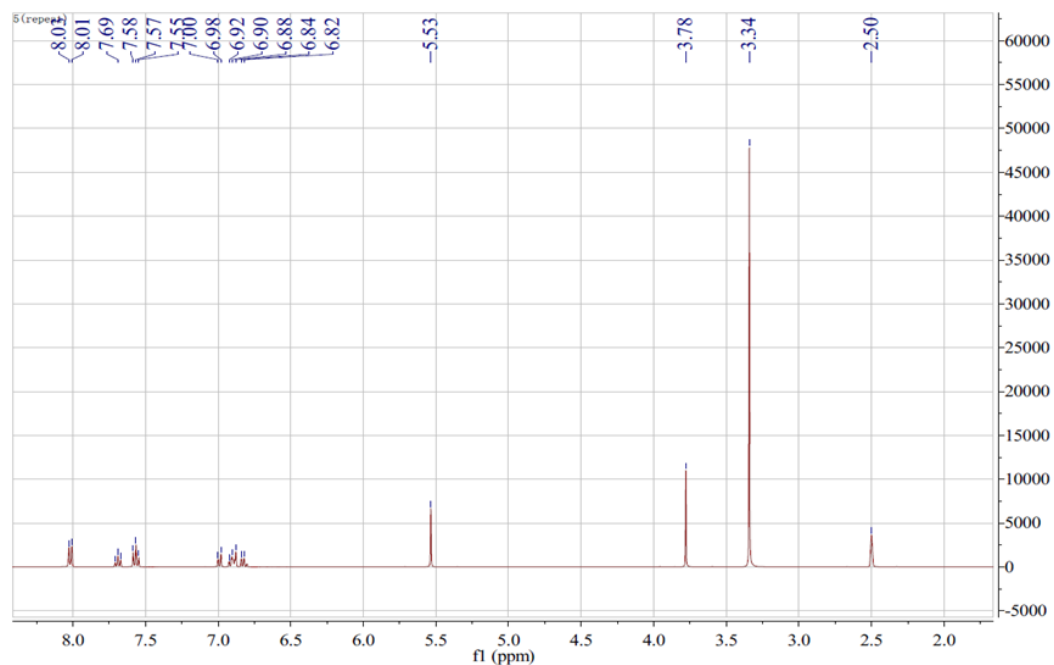

### <sup>13</sup>C NMR (400 MHz, D6-DMSO)

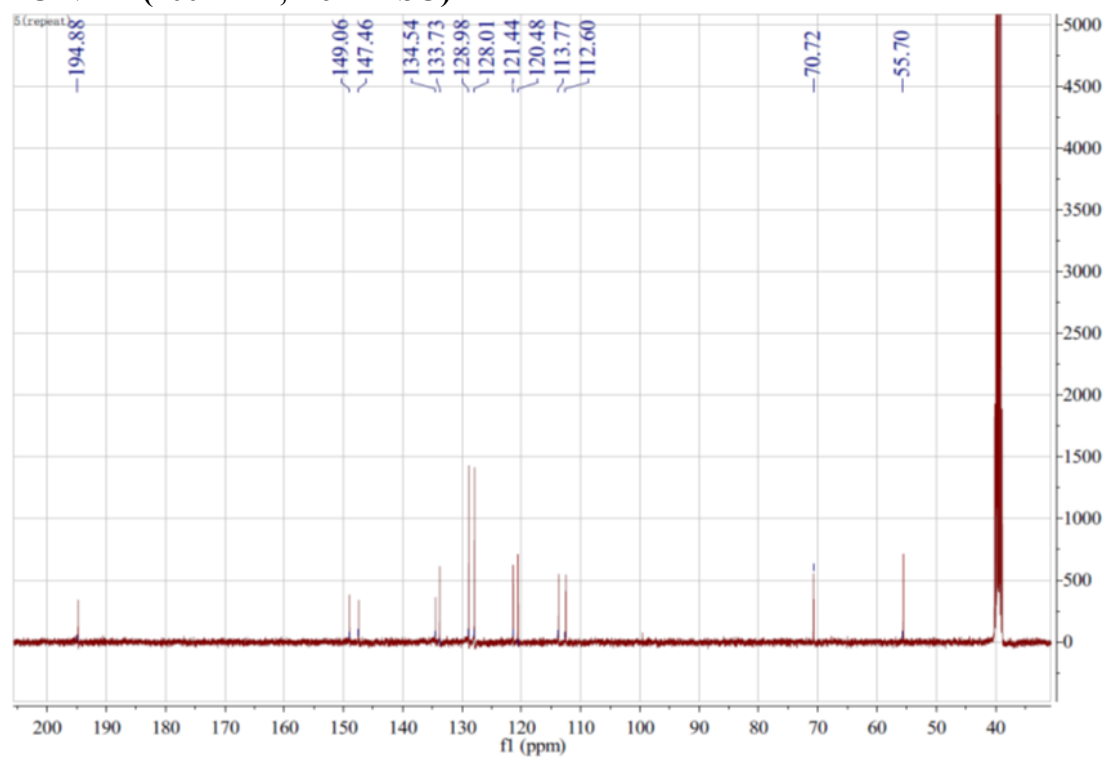

# 1-(4-methoxyphenyl)-2-phenoxyethan-1-one

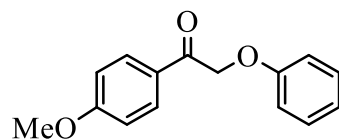

## <sup>1</sup>H NMR (400 MHz, D6-DMSO)

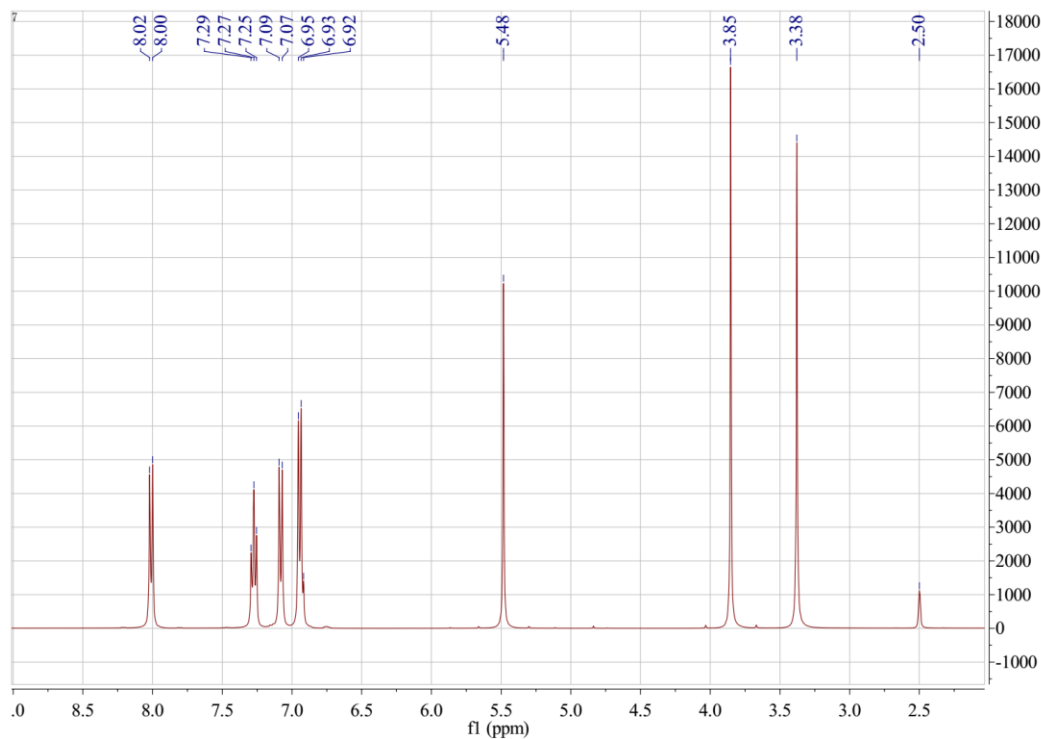

## <sup>13</sup>C NMR (400 MHz, D6-DMSO)

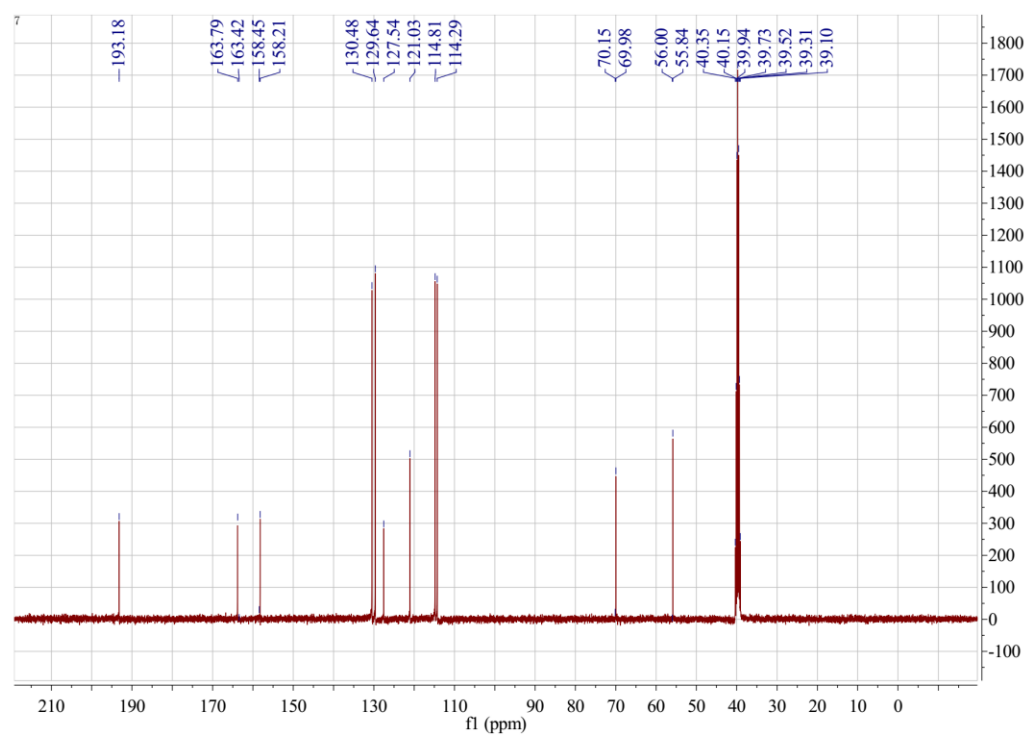



## 2-(2-methoxyphenoxy)-1-(4-methoxyphenyl)ethan-1-one

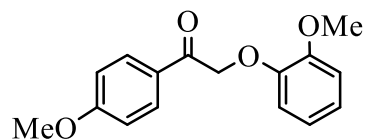

### <sup>1</sup>H NMR (400 MHz, D6-DMSO)

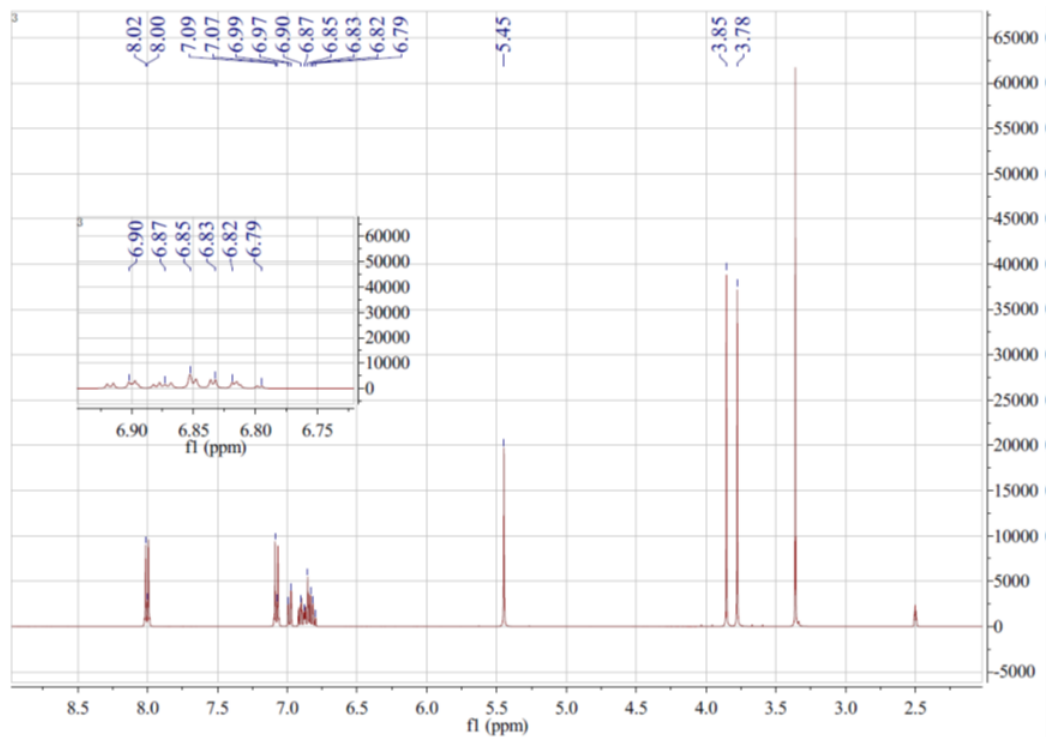

### <sup>13</sup>C NMR (400 MHz, D6-DMSO)

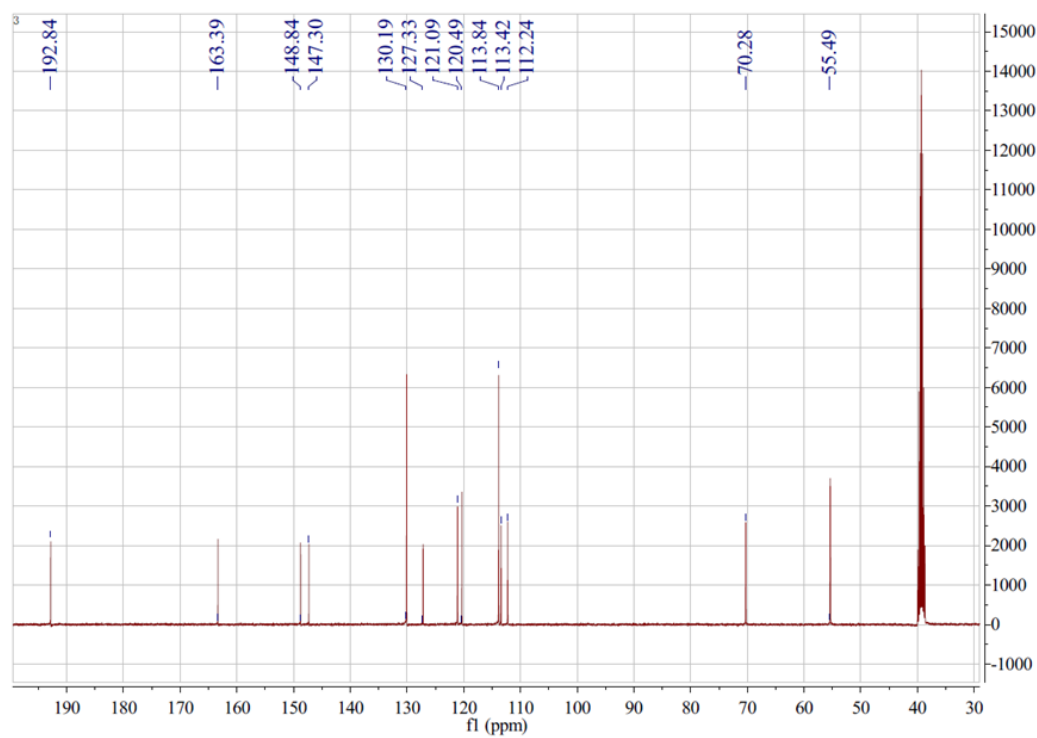

1-

### (3,4-dimethoxyphenyl)-2-phenoxyethan-1-one

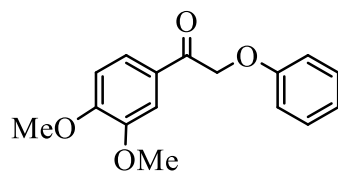

### <sup>1</sup>H NMR (400 MHz, D6-DMSO)

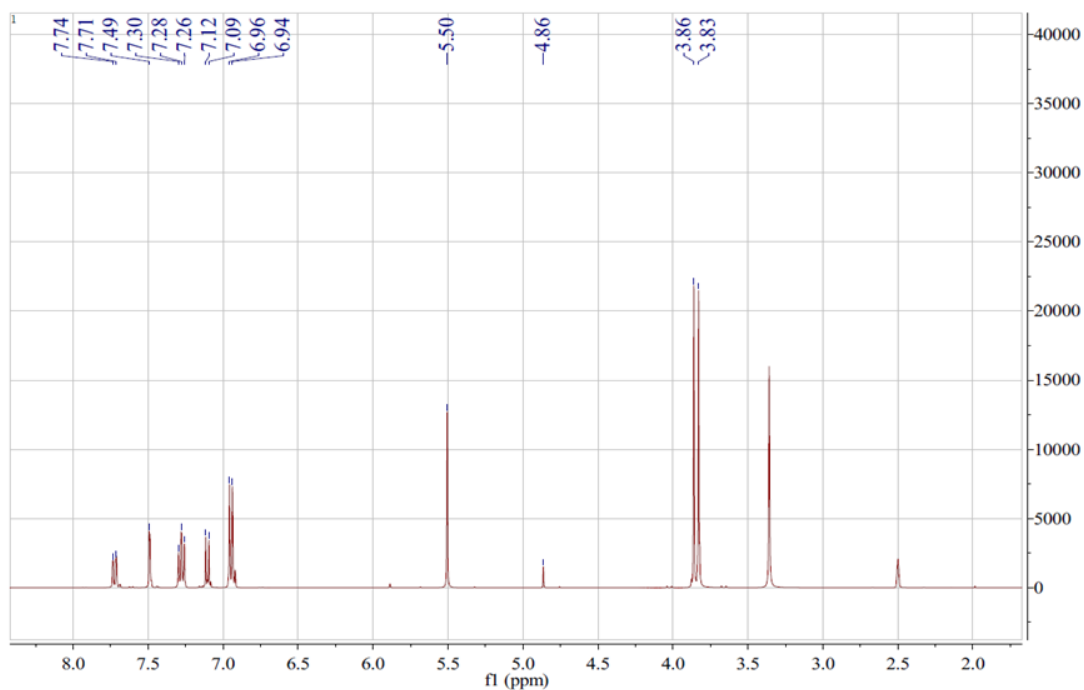

### <sup>13</sup>C NMR (400 MHz, D6-DMSO)

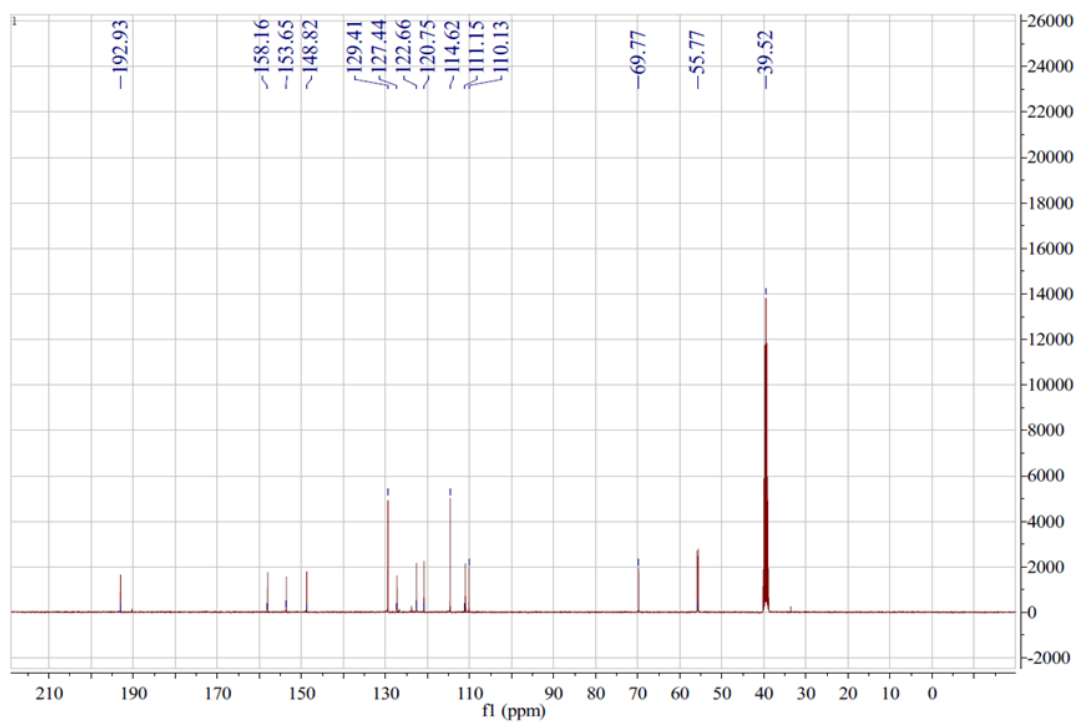

# 1-(3,4-dimethoxyphenyl)-2-(2-methoxyphenoxy)ethan-1-one

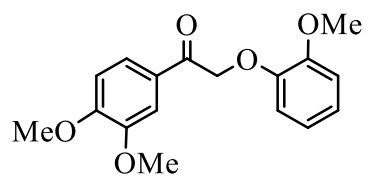

## $^1\text{H}$ NMR (400 MHz, D<sub>6</sub>-DMSO)

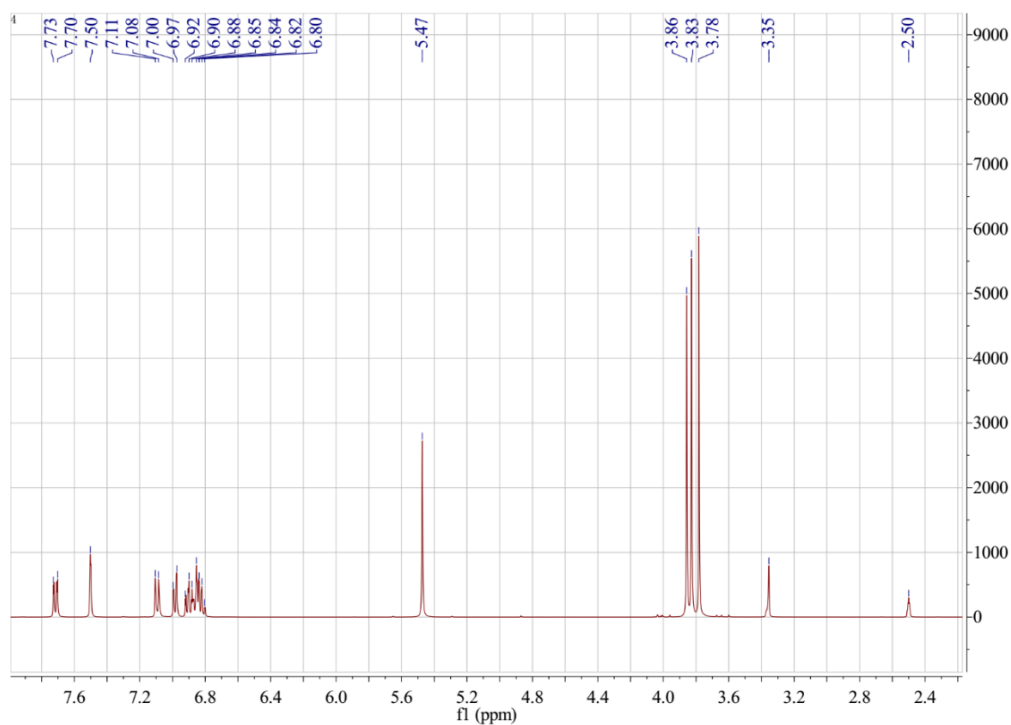

$^{13}\text{C}$

## NMR (400 MHz, D<sub>6</sub>-DMSO)

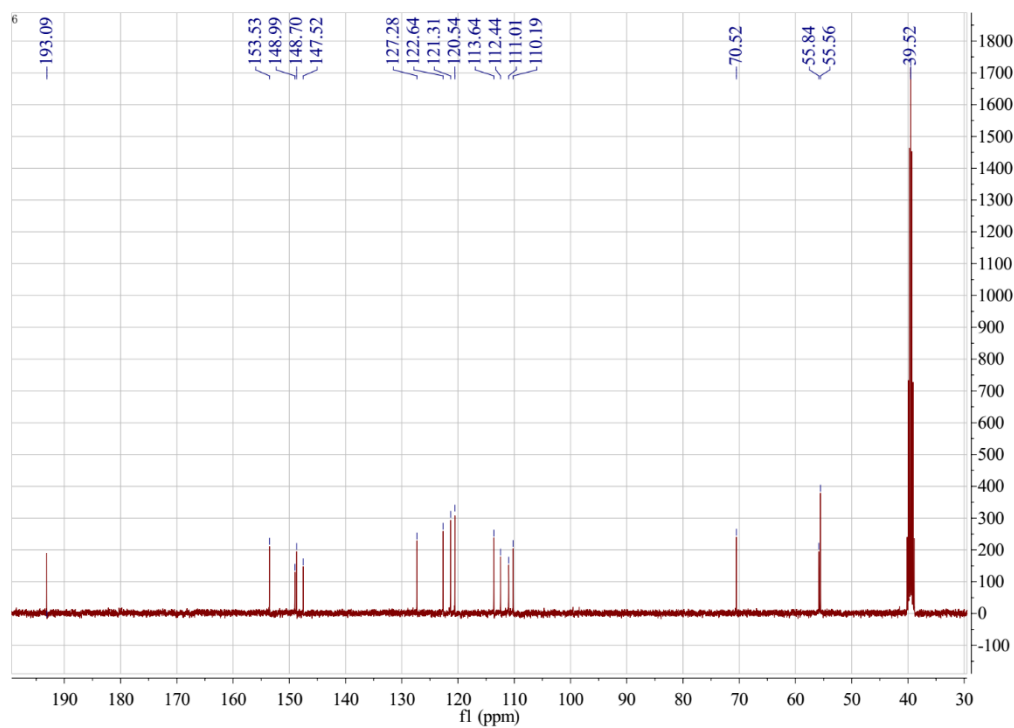

## 2-phenoxy-1-phenylethanol

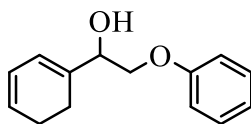

### $^1\text{H}$ NMR (400 MHz, D6-DMSO)

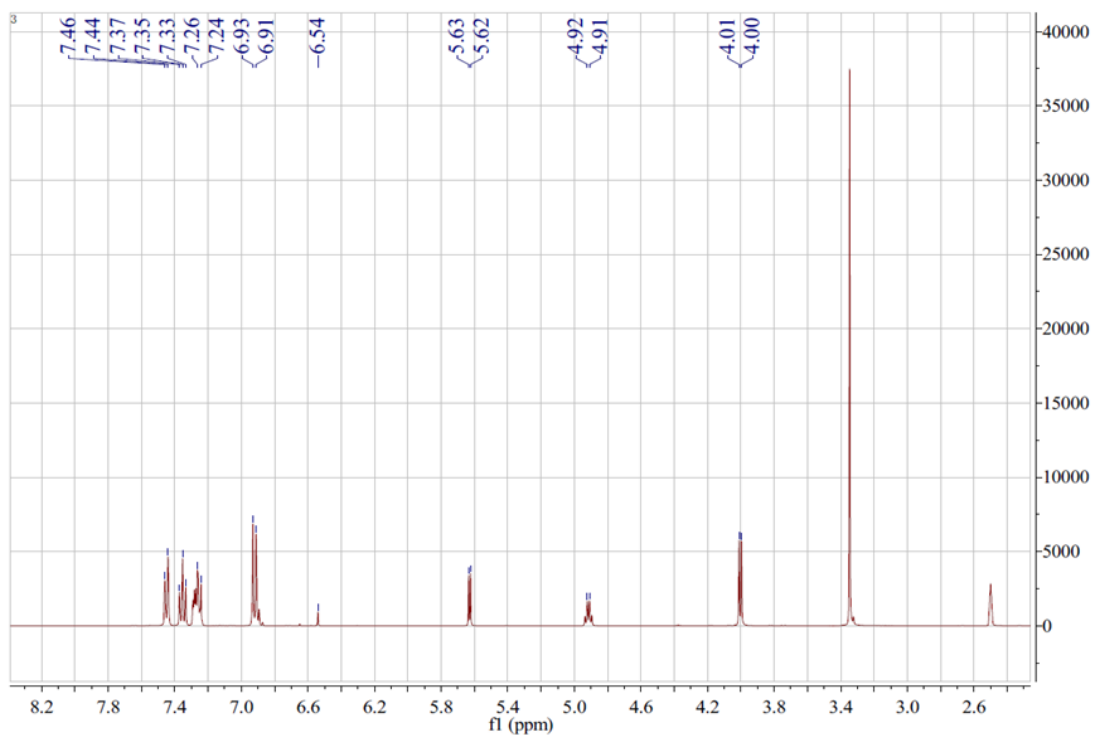

### $^{13}\text{C}$ NMR (400 MHz, D6-DMSO)

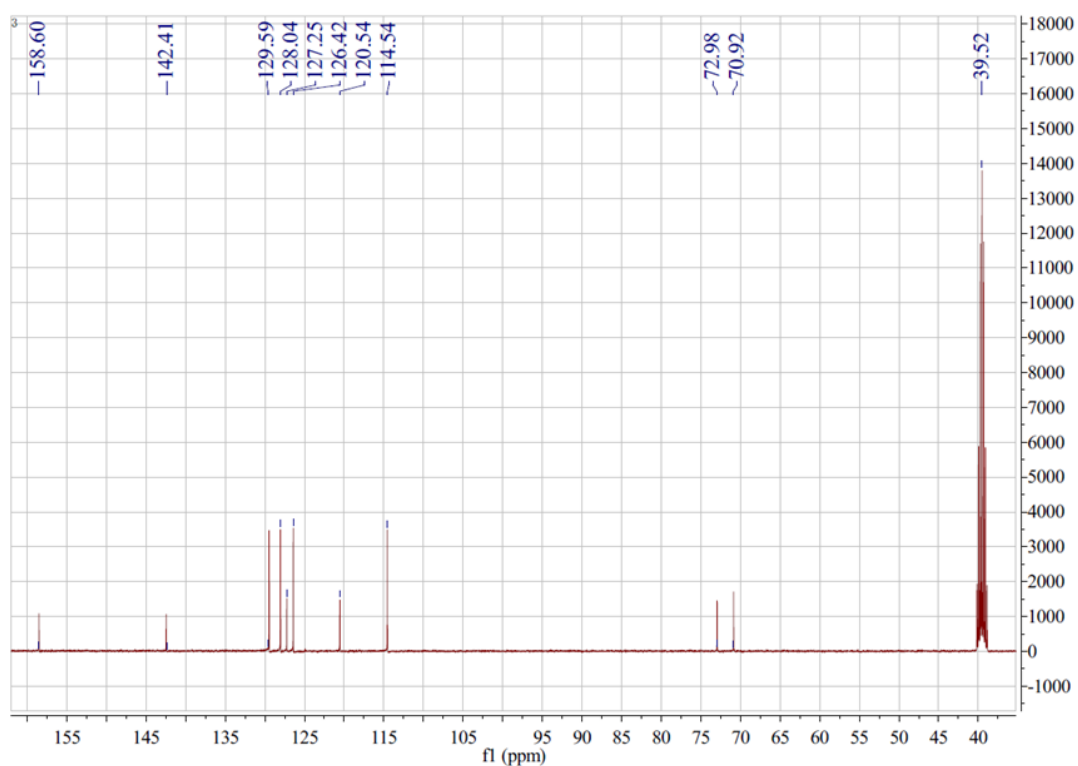

## 2-(2-methoxyphenoxy)-1-phenylethan-1-ol

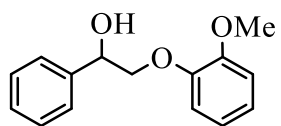

### <sup>1</sup>H NMR (400 MHz, D6-DMSO)

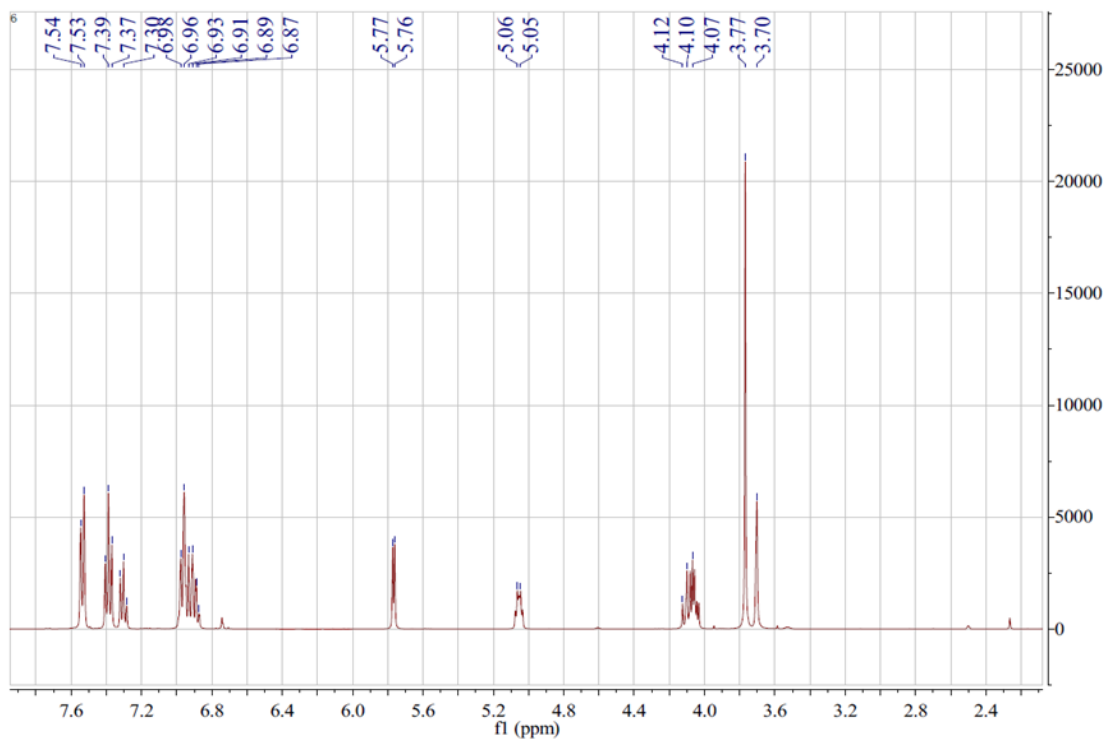

### <sup>13</sup>C NMR (400 MHz, D6-DMSO)

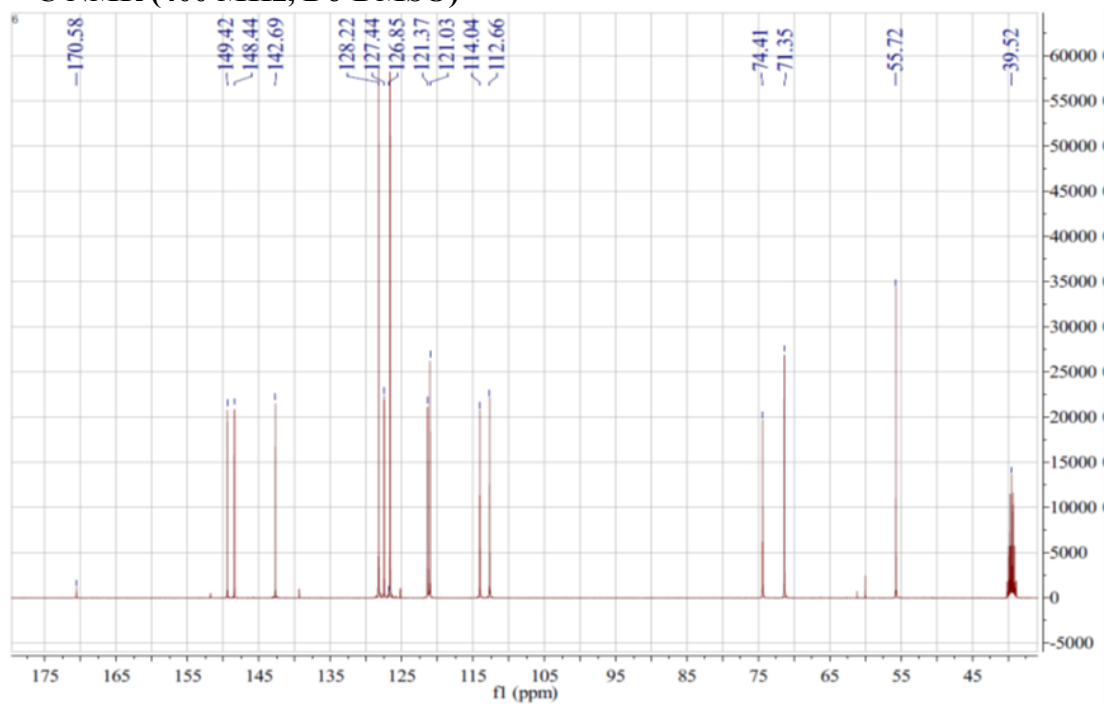

# 1-(4-methoxyphenyl)-2-phenoxyethan-1-ol

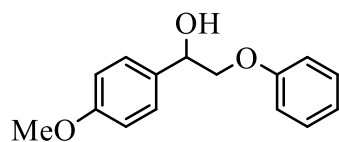

## <sup>1</sup>H NMR (400 MHz, D6-DMSO)

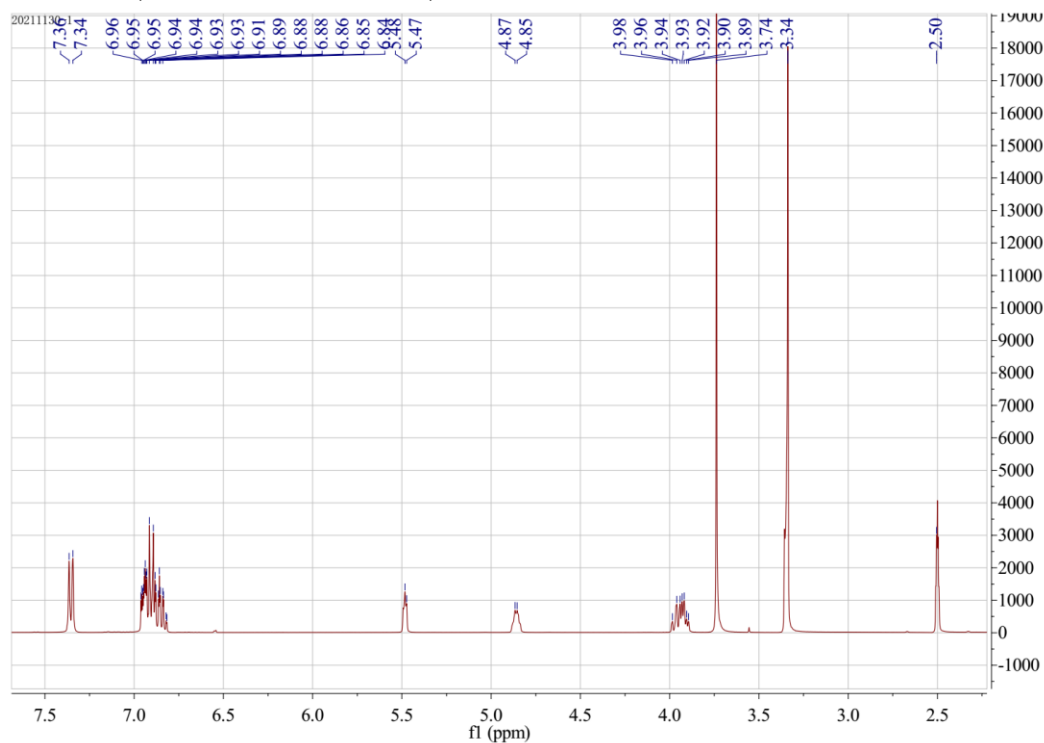

## <sup>13</sup>C NMR (400 MHz, D6-DMSO)

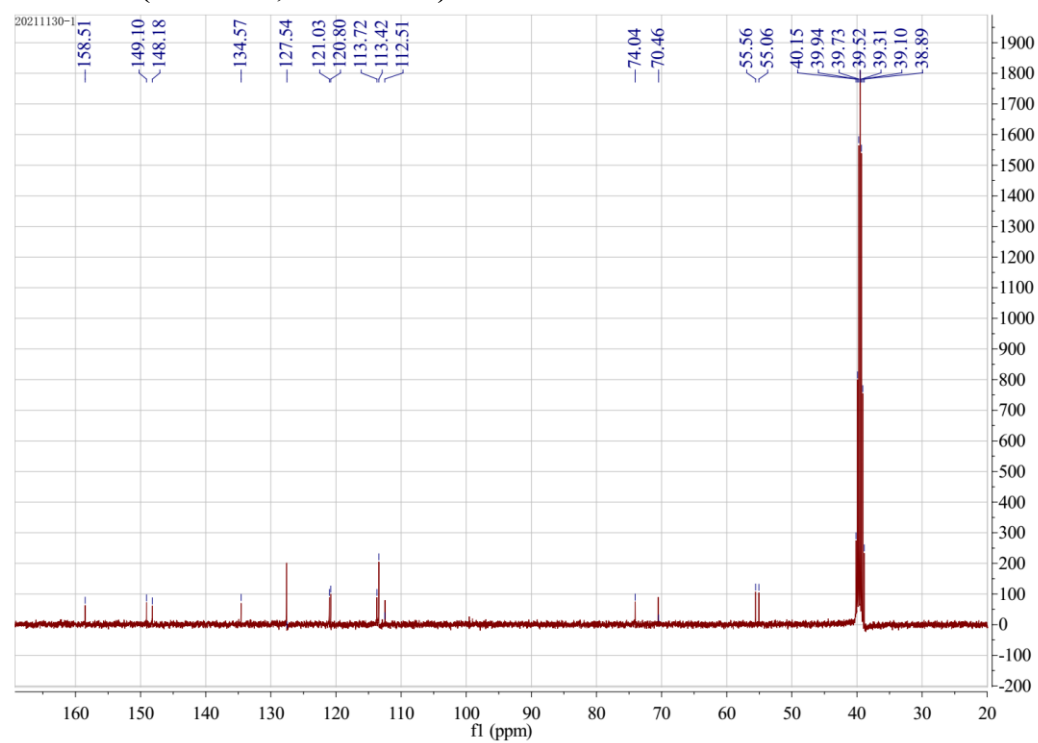

## 2-(2-methoxyphenoxy)-1-(4-methoxyphenyl)ethan-1-ol

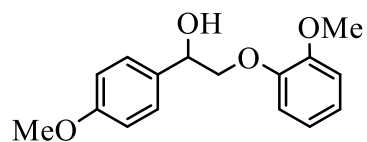

### $^1\text{H}$ NMR (400 MHz, D6-DMSO)

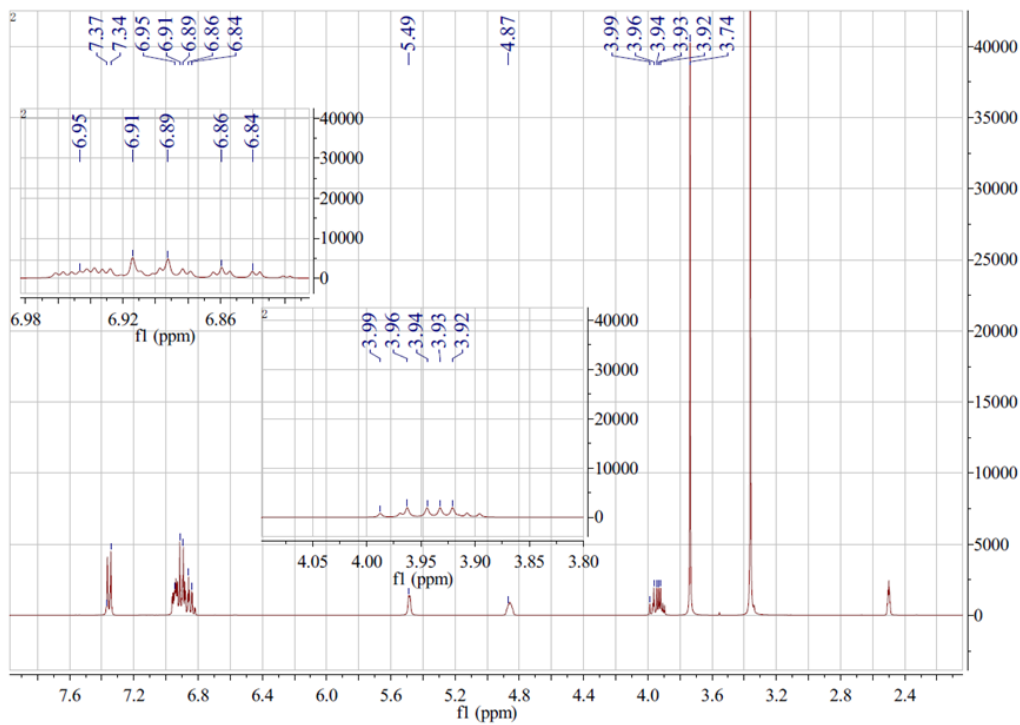

### $^{13}\text{C}$ NMR (400 MHz, D6-DMSO)

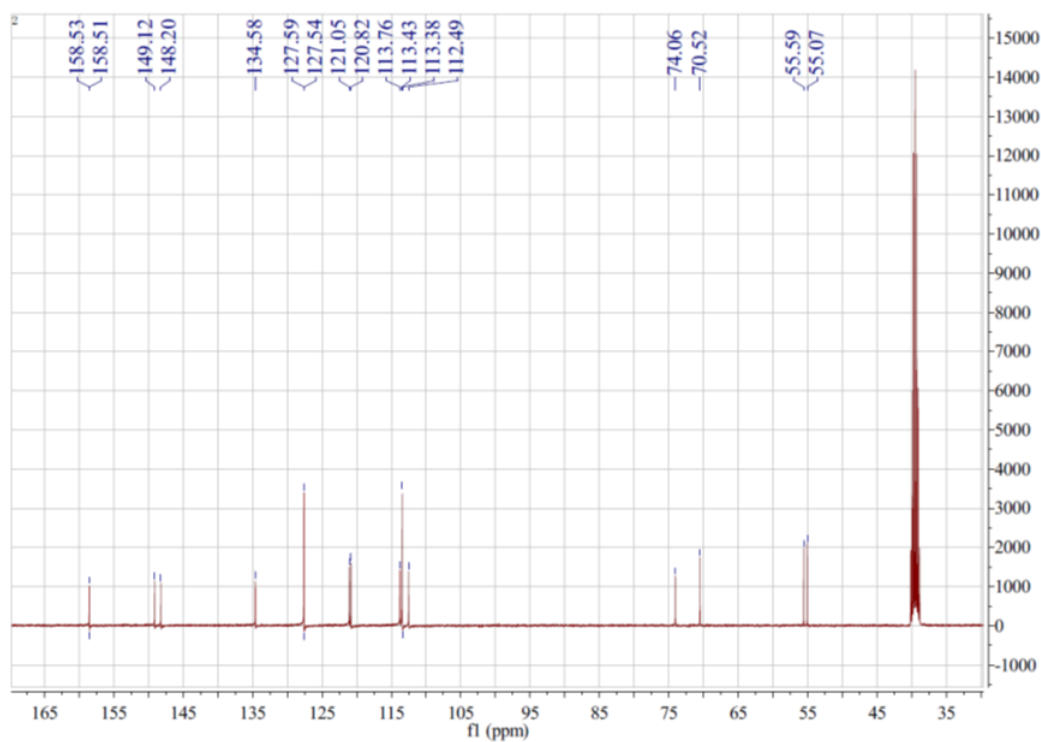

# 1-(3,4-dimethoxyphenyl)-2-phenoxyethan-1-ol

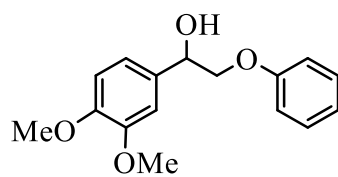

## <sup>1</sup>H NMR (400 MHz, D6-DMSO)

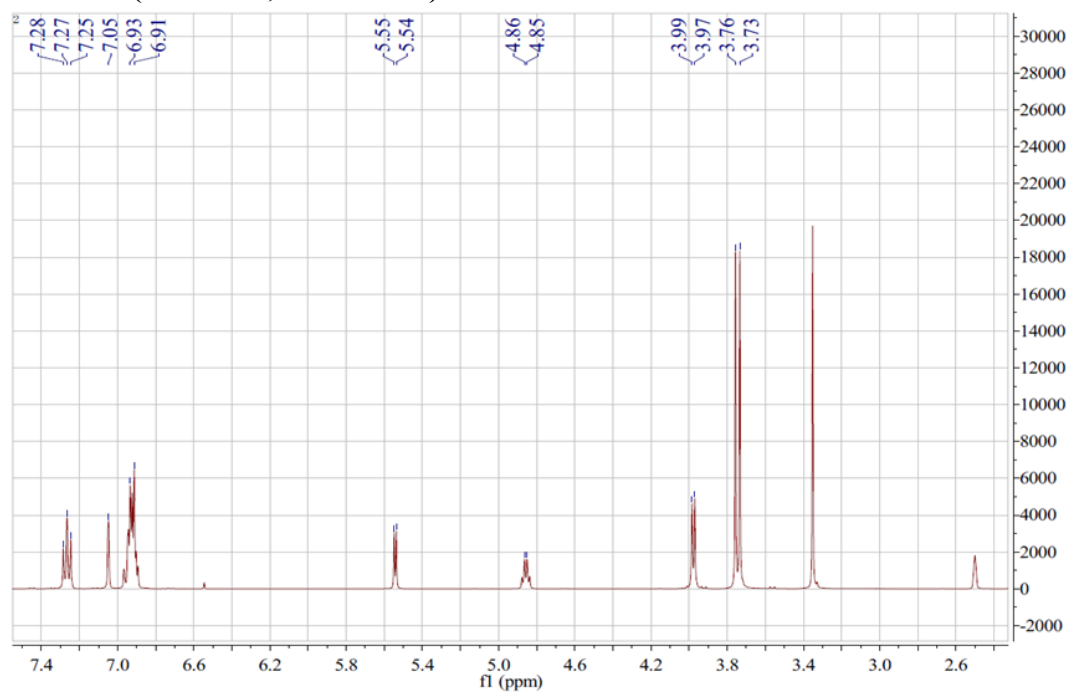

## <sup>13</sup>C NMR (400 MHz, D6-DMSO)

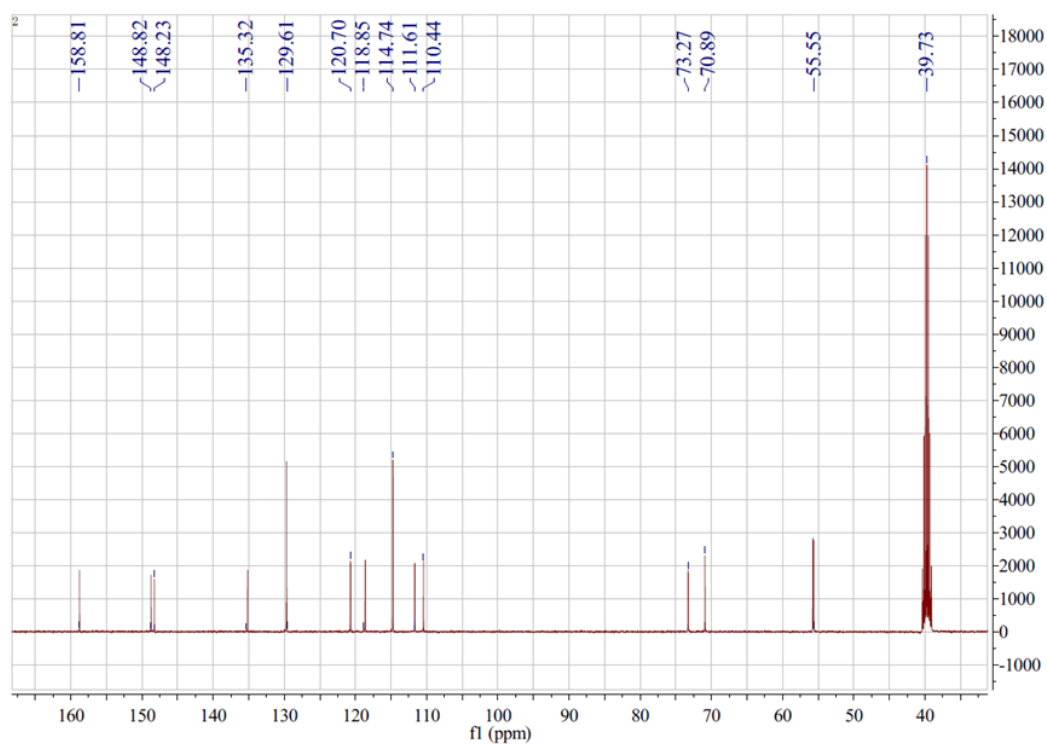



# 1-(3,4-dimethoxyphenyl)-2-(2-methoxyphenoxy)ethan-1-ol

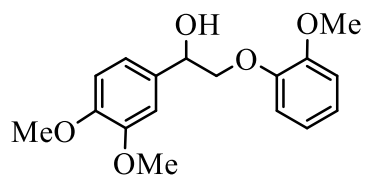

## <sup>1</sup>H NMR (400 MHz, D6-DMSO)

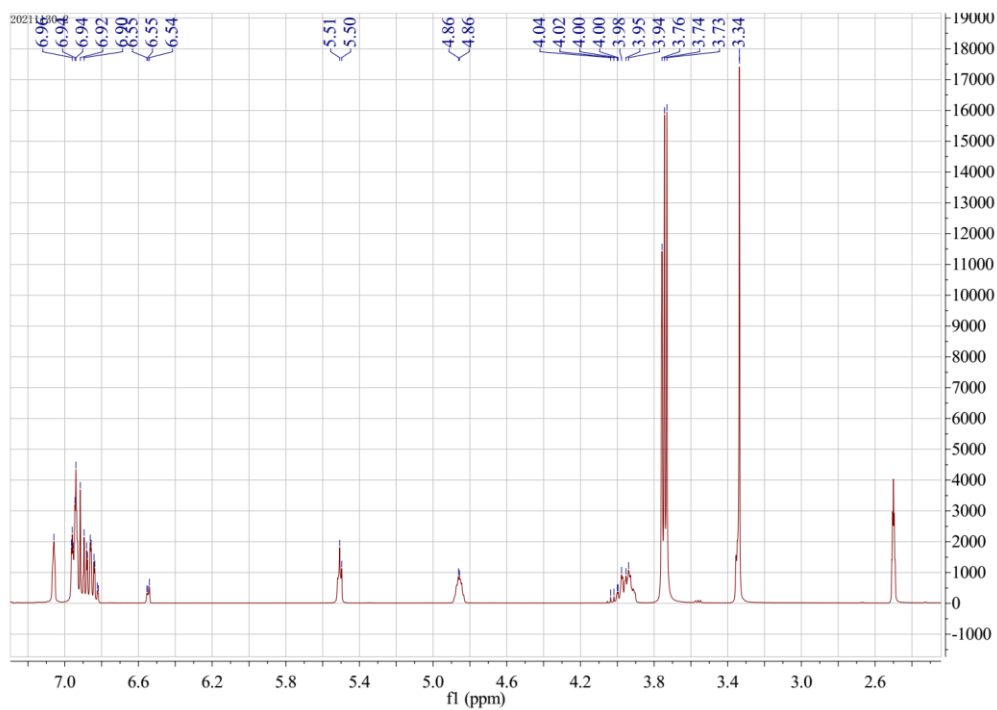

## <sup>13</sup>C NMR (400 MHz, D6-DMSO)

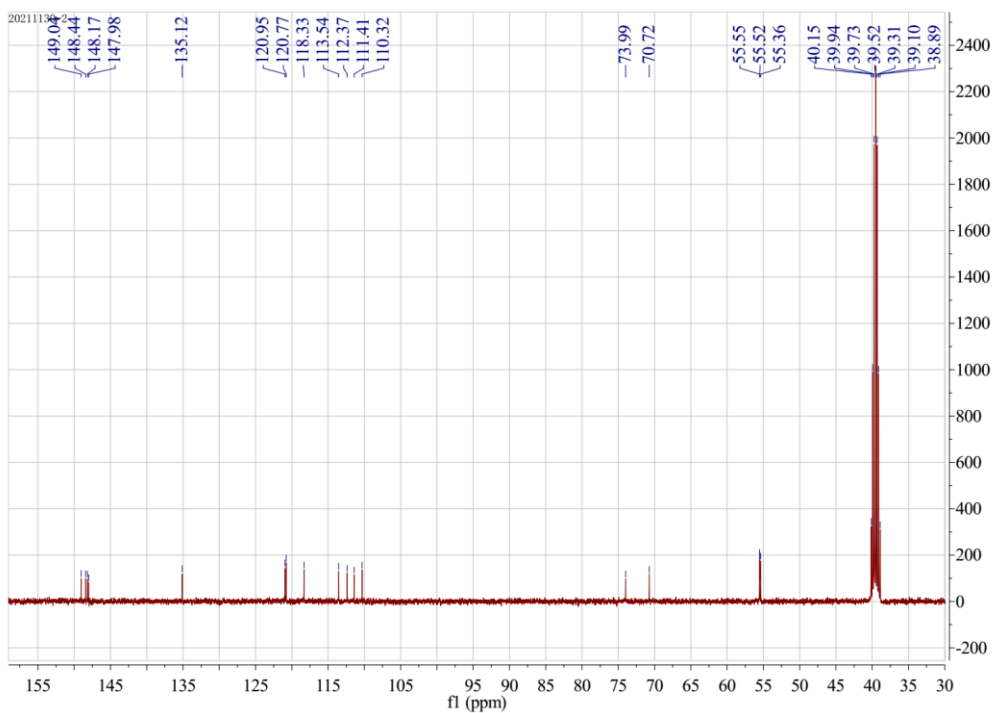

# 1-(3,4-dimethoxyphenyl)-2-(2-methoxyphenoxy)propane-1,3-diol

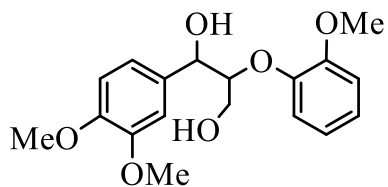

## <sup>1</sup>H NMR (400 MHz, D6-DMSO)

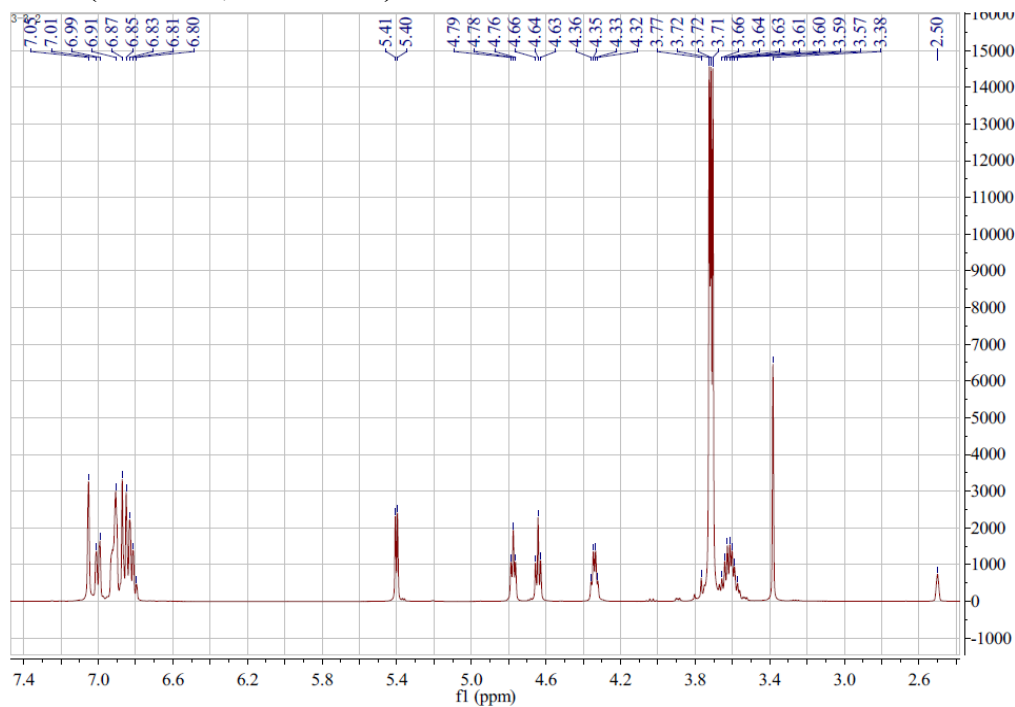

## <sup>13</sup>C NMR (400 MHz, D6-DMSO)

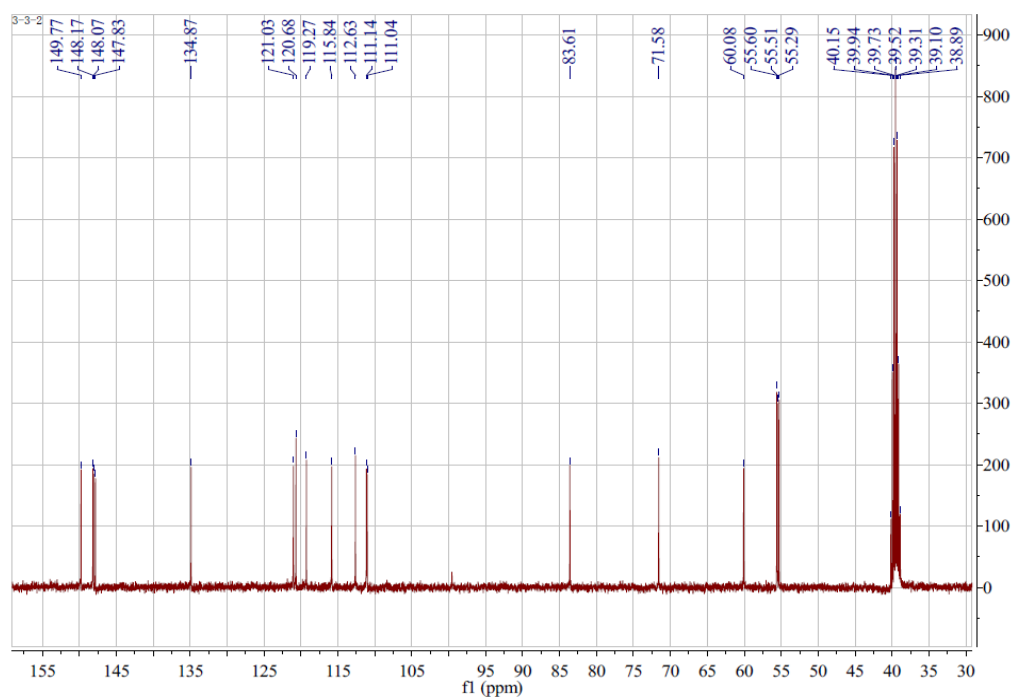

# 1-(3,4-dimethoxyphenyl)-3-hydroxy-2-(2-methoxyphenoxy)propan-1-one

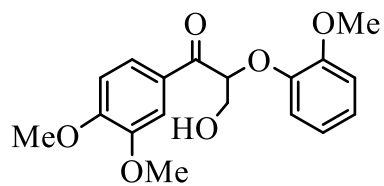

## <sup>1</sup>H NMR (400 MHz, D6-DMSO)

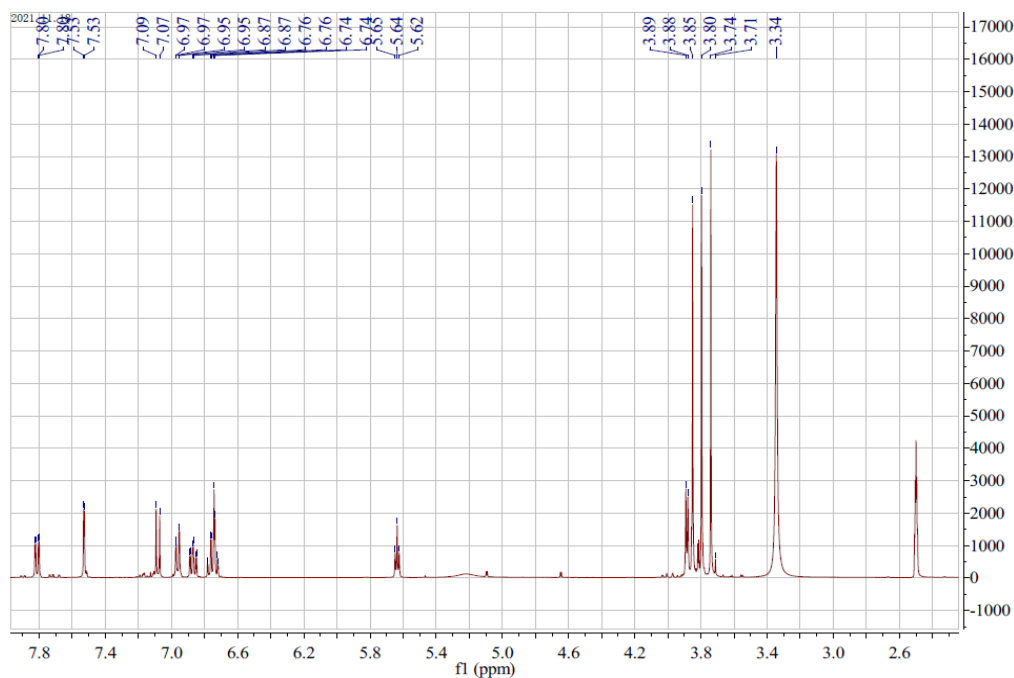

## <sup>13</sup>C NMR (400 MHz, D6-DMSO)

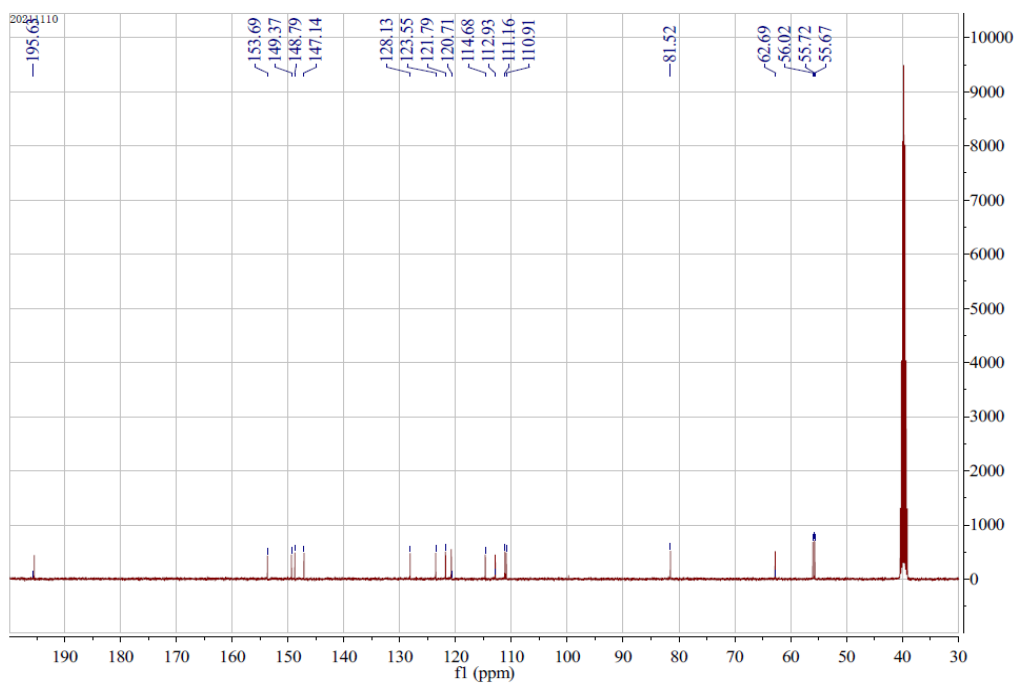

# Guaiacylglycerol-guaiacyl ether

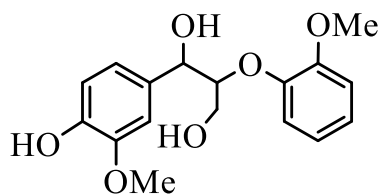

## <sup>1</sup>H NMR (400 MHz, D<sub>6</sub>-DMSO)

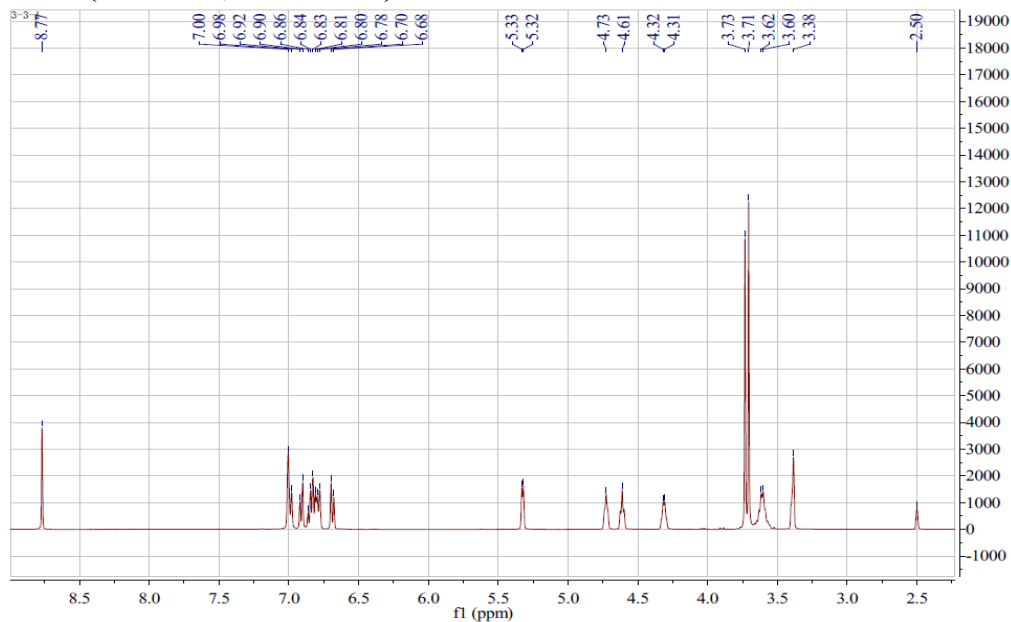

## <sup>13</sup>C NMR (400 MHz, D<sub>6</sub>-DMSO)

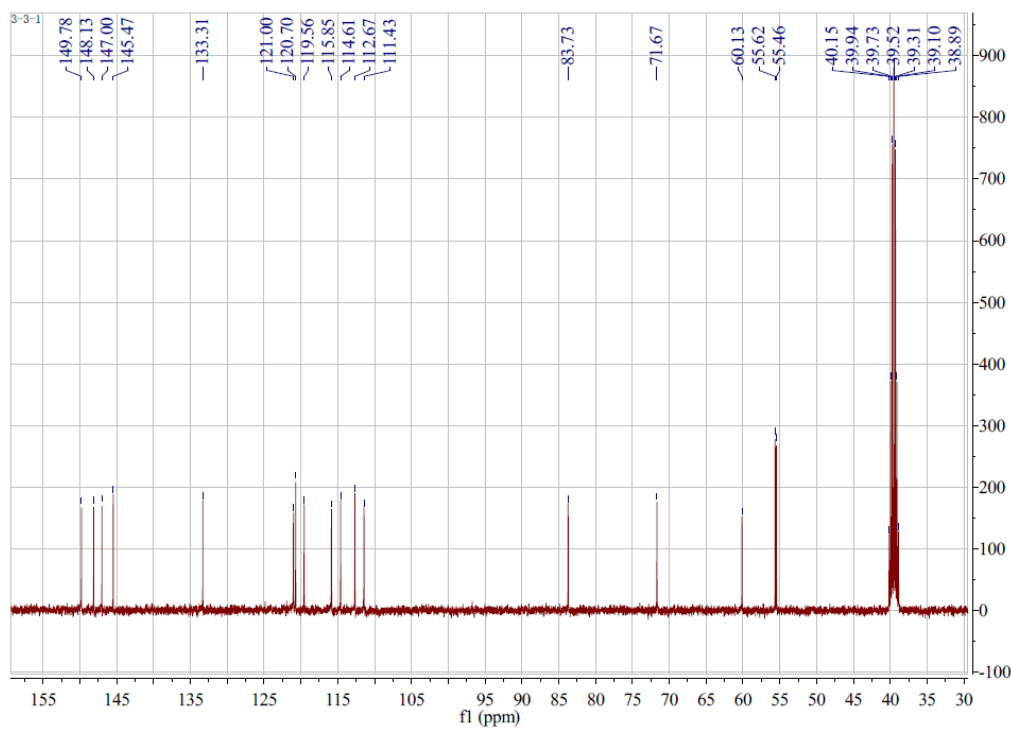

Supplement: d2se00080f1.pdf [file d2se00080f1.pdf]
